# Supplementary material
Source: Springer Nature journal article supplement (https://www.springermedizin.de/resource/supplementary/12936_2008_652_MOESM3_ESM.pdf/9547920)

Un-diluted  
1/10  
1/100  
1/200  
1/500  
1/1000  
1/5000  
1/10000  
1/1000000

**A**

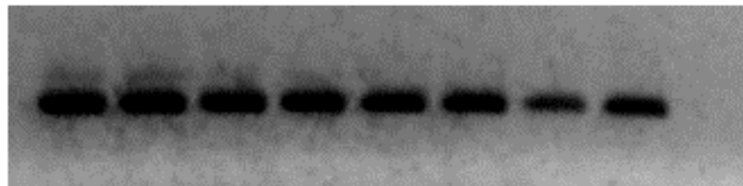

**B**

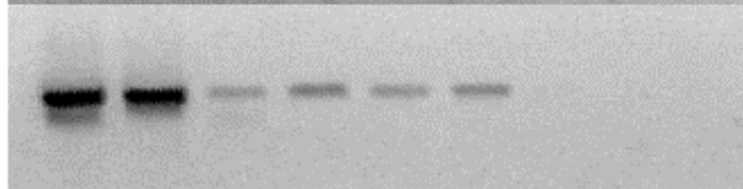

**C**

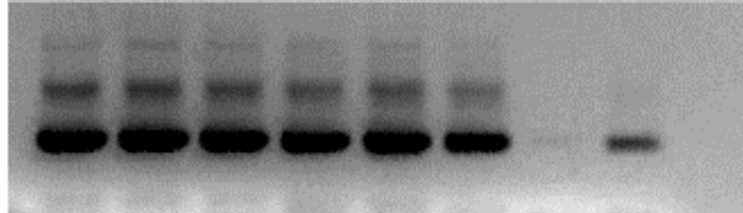

Supplement: MOESM3 [file 9547920]
